# Supplementary material for: Consumption of cranberry as adjuvant therapy for urinary tract infections in susceptible populations: A systematic review and meta-analysis with trial sequential analysis
Source: PubMed Central journal article supplement (PMC8412316; doi:10.1371/journal.pone.0256992), 2021-09-02
Supplement: pone.0256992.s002.pdf [file pone.0256992.s002.pdf]

**S1 Table. Study Design of the 28 Included Randomized Controlled Trials Evaluating Cranberry-Containing Products in the Prevention of UTI**

| <b>Source</b>                  | <b>Design</b> | <b>Washout period</b> | <b>Analysis</b> | <b>Study Duration</b> | <b>Loss to Follow-up,<br/>No./Total No. (%)</b> |
|--------------------------------|---------------|-----------------------|-----------------|-----------------------|-------------------------------------------------|
| Avorn et al,1994               | Parallel      | NA                    | ITT             | 6 mo                  | 32/153 (21)                                     |
| Foda et al,1995                | Crossover     | None                  | PP              | 12mo                  | 19/40 (48)                                      |
| Walker et al,1997              | Crossover     | None                  | PP              | 6 mo                  | 9/19 (47)                                       |
| Schlager et al,1999            | Crossover     | None                  | ITT             | 6 mo                  | 0/15 (0)                                        |
| Kontiokari et al,2001          | Parallel      | NA                    | ITT             | 6 mo                  | 9/50 (18)                                       |
| McGuinness et al,2002          | Parallel      | NA                    | ITT             | 6 mo                  | 12/135 (9)                                      |
| Stothers et al (a) Tablet-2002 | Parallel      | NA                    | ITT             | 12mo                  | NR                                              |
| Stothers et al (b) Juice-2002  | Parallel      | NA                    | ITT             | 12mo                  | NR                                              |
| Waites et al,2004              | Parallel      | NA                    | PP              | 6 mo                  | 26/74 (35)                                      |

|                                      |           |      |     |                   |                |
|--------------------------------------|-----------|------|-----|-------------------|----------------|
| McMurdo et al,2005                   | Parallel  | NA   | ITT | 35 d              | 115/376 (30.6) |
| Hess et al,2008                      | Crossover | None | PP  | 12mo              | 10/57 (18)     |
| Wing et al (a) High Dose -2008       | Parallel  | NA   | ITT | 6 mo <sup>a</sup> | 73/188 (39)    |
| Wing et al (b) Low Dose-2008         | Parallel  | NA   | ITT | 6 mo <sup>a</sup> | 73/188 (39)    |
| Ferrara et al,2009                   | Parallel  | NA   | PP  | 6 mo              | 3/57 (5)       |
| Barbosa-Cesnik et al,2011            | Parallel  | NA   | ITT | 6 mo              | 89/319 (27.9)  |
| Sengupta et al,2011                  | Parallel  | NA   | PP  | 90 d              | 3/60 (5)       |
| Stapleton et al,2012                 | Parallel  | NA   | ITT | 6 mo              | 66/186 (35)    |
| Salo et al,2012                      | Parallel  | NA   | PP  | 6 mo              | 8/263 (3)      |
| Afshar et al,2012                    | Parallel  | NA   | ITT | 12mo              | 12/40 (30)     |
| Takahashi et al,2013                 | Parallel  | NA   | PP  | 24 w              | 24/237 (10)    |
| Caljouw et al (a) High UTI risk-2014 | Parallel  | NA   | ITT | 12mo              | 331/928 (36)   |
| Caljouw et al (b) Low UTI risk-2014  | Parallel  | NA   | ITT | 12mo              | 331/928 (36)   |

|                          |          |    |     |       |             |
|--------------------------|----------|----|-----|-------|-------------|
| Foxman et al,2015        | Parallel | NA | ITT | 6 w   | 7/180 (4)   |
| Vostalova et al,2015     | Parallel | NA | ITT | 6 mo  | 17/182 (9)  |
| Ledda et al,2015         | Parallel | NA | ITT | 60 d  | NR          |
| Juthani-Mehta et al,2016 | Parallel | NA | ITT | 12mo  | 38/185 (21) |
| Maki et al,2016          | Parallel | NA | ITT | 24 w  | 21/373 (6)  |
| Wan et al,2016           | Parallel | NA | ITT | 6 mo  | 0           |
| Ostrovsky et al,2017     | Parallel | NA | ITT | 360 d | NR (20)     |
| Temiz et al,2018         | Parallel | NA | PP  | 3 mo  | 27/87 (31)  |
| Mooren et al,2020        | Parallel | NA | ITT | 6 w   | 0           |

---

ITT=Intention To Treat, NA=Not Applicable, NR=Not Reported, PP=Per Protocol. <sup>a</sup> Pregnant women were followed from prior to week 16 of gestation through delivery.
