# Supplementary material for: Consumption of cranberry as adjuvant therapy for urinary tract infections in susceptible populations: A systematic review and meta-analysis with trial sequential analysis
Source: PubMed Central journal article supplement (PMC8412316; doi:10.1371/journal.pone.0256992), 2021-09-02
Supplement: pone.0256992.s003.pdf [file pone.0256992.s003.pdf]

**S2 Table. Quality of Reporting of the 28 Included Randomized Controlled Trials Evaluating Cranberry-Containing Products in the Prevention of UTI**

| Reference                      | Risk of Bias Assessment    |                        |                                        |                                |                         |                     |            |
|--------------------------------|----------------------------|------------------------|----------------------------------------|--------------------------------|-------------------------|---------------------|------------|
|                                | Random Sequence Generation | Allocation Concealment | Blinding of participants and personnel | Blinding of outcome assessment | Incomplete outcome data | Selective Reporting | Other bias |
| Avorn et al,1994               | H                          | H                      | L                                      | L                              | H                       | H                   | U          |
| Foda et al,1995                | U                          | U                      | L                                      | L                              | H                       | H                   | U          |
| Walker et al,1997              | U                          | U                      | L                                      | L                              | H                       | U                   | U          |
| Schlager et al,1999            | U                          | U                      | L                                      | L                              | L                       | H                   | U          |
| Kontiokari et al,2001          | L                          | L                      | L                                      | L                              | H                       | L                   | U          |
| McGuinness et al,2002          | U                          | U                      | L                                      | L                              | H                       | H                   | U          |
| Stothers et al (a) Tablet-2002 | L                          | L                      | H                                      | U                              | L                       | U                   | U          |

|                                      |   |   |   |   |   |   |   |
|--------------------------------------|---|---|---|---|---|---|---|
| Stothers et al (b) Juice-2002        | L | L | H | U | L | U | U |
| Waites et al,2004                    | U | U | L | L | H | H | L |
| McMurdo et al,2005                   | L | L | L | L | L | H | L |
| Hess et al,2008                      | U | U | L | L | U | H | L |
| Wing et al (a) High Dose-2008        | L | U | L | L | H | H | U |
| Wing et al (b) Low Dose-2008         | L | U | L | L | H | H | U |
| Afshar et al,2012                    | L | H | L | L | U | L | U |
| Takahashi et al,2013                 | U | L | L | L | L | L | L |
| Caljouw et al (a) High UTI risk-2014 | U | L | L | L | L | L | U |
| Caljouw et al (b) Low UTI risk-2014  | U | L | L | L | L | L | U |
| Foxman et al,2015                    | L | L | L | L | L | L | L |
| Vostalova et al,2015                 | U | L | L | U | L | H | H |
| Ledda et al,2015                     | U | U | U | U | L | U | U |

|                          |   |   |   |   |   |   |   |   |
|--------------------------|---|---|---|---|---|---|---|---|
| Juthani-Mehta et al,2016 | L | L | L | L | L | L | L | L |
| Maki et al,2016          | L | U | L | L | L | L | L | L |
| Wan et al,2016           | L | L | L | L | L | L | L | U |
| Ostrovsky et al,2017     | L | U | U | U | L | U | U | U |
| Temiz et al,2018         | L | U | L | L | L | L | L | U |
| Juthani-Mehta et al,2016 | L | L | L | L | L | L | L | L |
| Maki et al,2016          | L | U | L | L | L | L | L | L |
| Wan et al,2016           | L | L | L | L | L | L | L | U |
| Ostrovsky et al,2017     | L | U | U | U | L | U | U | U |
| Temiz et al,2018         | L | U | L | L | L | L | L | U |
| Mooren et al,2020        | L | L | L | L | L | L | L | L |

---

U=unclear risk of bias, L=low risk of bias, H=high risk of bias.
