# Supplementary material for: Consumption of cranberry as adjuvant therapy for urinary tract infections in susceptible populations: A systematic review and meta-analysis with trial sequential analysis
Source: PubMed Central journal article supplement (PMC8412316; doi:10.1371/journal.pone.0256992), 2021-09-02
Supplement: pone.0256992.s004.pdf [file pone.0256992.s004.pdf]

**S3 Table. Characteristics of Study Populations in the 28 Included Randomized Controlled Trials Evaluating Cranberry-Containing Products in the Prevention of UTIs**

| <b>Source</b>                      | <b>No. of patients</b> | <b>Study region</b> | <b>Setting</b>  | <b>Age, Range (Mean or Median), y</b> | <b>Subgroup</b>                   | <b>Female, %</b> |
|------------------------------------|------------------------|---------------------|-----------------|---------------------------------------|-----------------------------------|------------------|
| Avorn et al,1994                   | 153                    | US                  | Nursing homes   | NA (78.6)                             | Elderly patients                  | 100              |
| Foda et al,1995                    | 21                     | Canada              | Hospital clinic | 1.4-18 (NA)                           | Patients with neuropathic bladder | 43               |
| Walker et al,1997                  | 10                     | US                  | Unclear         | 28-44 (37)                            | Women with recurrent UTIs         | 100              |
| Schlager et al,1999                | 15                     | US                  | Hospital clinic | 2-18 (NA)                             | Patients with neuropathic bladder | 53               |
| Kontiokari et al,2001              | 100                    | Finland             | Hospital clinic | NA (30.5)                             | Women with recurrent UTIs         | 100              |
| McGuinness et al,2002              | 135                    | Canada              | Hospital clinic | NA (45.1)                             | Patients with neuropathic bladder | 79               |
| Stothers et al (a) Tablet-<br>2002 | 150                    | Canada              | Unclear         | 21-72 (42.3)                          | Women with recurrent UTIs         | 100              |

|                                   |     |        |                 |              |                                   |     |
|-----------------------------------|-----|--------|-----------------|--------------|-----------------------------------|-----|
| Stothers et al (b) Juice-<br>2002 | 150 | Canada | Unclear         | 21-72 (42.3) | Women with recurrent UTIs         | 100 |
| Waites et al,2004                 | 48  | US     | Hospital clinic | 20-73 (40.9) | Patients with neuropathic bladder | 13  |
| McMurdo et al,2005                | 376 | UK     | Inpatients      | >60 (81.4)   | Elderly patients                  | 68  |
| Hess et al,2008                   | 47  | US     | Hospital clinic | 28-79 (53)   | Patients with neuropathic bladder | 0   |
| Wing et al (a) High Dose-<br>2008 | 188 | US     | Hospital clinic | NA (26.4)    | Pregnant women                    | 100 |
| Wing et al (b) Low Dose-<br>2008  | 188 | US     | Hospital clinic | NA (26.4)    | Pregnant women                    | 100 |
| Ferrara et al,2009                | 54  | Italy  | Hospital clinic | 3-14 (NA)    | Children                          | 100 |
| Barbosa-Cesnik et al,2011         | 319 | US     | Home            | 18-40 (21.2) | Women with recurrent UTIs         | 100 |
| Sengupta et al,2011               | 60  | India  | Hospital clinic | 18-40 (31.7) | Women with recurrent UTIs         | 100 |

|                                      |     |                |                           |              |                                                                |     |
|--------------------------------------|-----|----------------|---------------------------|--------------|----------------------------------------------------------------|-----|
| Stapleton et al,2012                 | 176 | US             | Hospital clinic           | 18-45 (25)   | Premenopausal women with a history of recent UTI               | 100 |
| Salo et al,2012                      | 263 | Finland        | Hospital clinic           | 1-16 (NA)    | Children with verified UTI                                     | 91  |
| Afshar et al,2012                    | 40  | Canada         | Hospital clinic           | <=18 (7)     | Children with documented symptomatic UTIs                      | 98  |
| Takahashi et al,2013                 | 150 | Japan          | Urology clinic            | 20-79 (NA)   | Patients with cystitis                                         | NA  |
| Caljouw et al (a) High UTI risk-2014 | 928 | Holland        | Long-term care facilities | >=65 (84)    | Long-term care facilities residents                            | 76  |
| Caljouw et al (b) Low UTI risk-2014  | 928 | Holland        | Long-term care facilities | >=65 (84)    | Long-term care facilities residents                            | 76  |
| Foxman et al,2015                    | 160 | US             | Hospital clinic           | >18 (NA)     | Women undergoing gynecological surgery and indwelling catheter | 100 |
| Vostalova et al,2015                 | 182 | Czech Republic | Hospital clinic           | 18-75 (36.7) | Women with recurrent UTIs                                      | 100 |

|                          |     |                 |                 |              |                                                         |     |
|--------------------------|-----|-----------------|-----------------|--------------|---------------------------------------------------------|-----|
| Ledda et al,2015         | 44  | Italy           | Unclear         | NA (39)      | Patients with a history of recurrent UTI                | 75  |
| Juthani-Mehta et al,2016 | 185 | US              | Nursing Homes   | >=65 (86.4)  | Older Women                                             | 100 |
| Maki et al,2016          | 373 | US              | Hospital clinic | 20-70 (40.9) | Women with recurrent UTIs                               | 100 |
| Wan et al,2016           | 67  | Taiwan, China   | Hospital clinic | 6-18 (9.5)   | Uncircumcised Boys                                      | 0   |
| Ostrovsky et al,2017     | 185 | US              | Nursing Homes   | NA (86)      | Women                                                   | 100 |
| Temiz et al,2018         | 60  | Turkey          | Hospital clinic | >=18 (63.8)  | Patients with ileal conduit diversion                   | 32  |
|                          | 210 | The Netherlands | Hospital clinic | >18 (62.5)   | Women with pelvic floor surgery and indwelling catheter | 100 |
| Mooren et al,2020        |     |                 |                 |              |                                                         |     |

---

PAC=A-type proanthocyanidin, UK=United Kingdom, US=United States, UTIs=urinary tract infections.
