# Supplementary material for: Consumption of cranberry as adjuvant therapy for urinary tract infections in susceptible populations: A systematic review and meta-analysis with trial sequential analysis
Source: PubMed Central journal article supplement (PMC8412316; doi:10.1371/journal.pone.0256992), 2021-09-02
Supplement: pone.0256992.s005.pdf [file pone.0256992.s005.pdf]

**S4 Table. Characteristics of Interventions in the 28 Included Randomized Controlled Trials Evaluating Cranberry-Containing Products in the Prevention of UTIs**

| Source              | Baseline Bacteriuria Excluded? | Cranberry Group         |              |                                            | Control Group            |                     |
|---------------------|--------------------------------|-------------------------|--------------|--------------------------------------------|--------------------------|---------------------|
|                     |                                | Form (Daily Dosage, mL) | Manufacturer | Cranberry Amount (g/d) (PAC Content, mg/d) | Dosing Frequency (Daily) | Formula             |
| Avorn et al,1994    | No                             | Juice (300)             | Ocean Spray  | NA                                         | Not specified            | Juice <sup>a</sup>  |
| Foda et al,1995     | No                             | Juice (15 mL/kg)        | Ocean Spray  | 4.5 g/kg/d                                 | 3-4                      | Water               |
| Walker et al,1997   | No                             | Capsule                 | Solaray      | 0.4                                        | Not specified            | Dicalcium Phosphate |
| Schlager et al,1999 | No                             | Juice (60)              | Ocean Spray  | NA                                         | Not specified            | Juice <sup>a</sup>  |

|                                |     |              |                   |             |               |                    |
|--------------------------------|-----|--------------|-------------------|-------------|---------------|--------------------|
| Kontiokari et al,2001          | Yes | Juice (50)   | Marli             | 7.5         | Not specified | No placebo         |
| McGuinness et al,2002          | No  | Capsule      | NOW Natural Foods | 8           | 1             | Beetroot           |
| Stothers et al (a) Tablet-2002 | Yes | Tablet (750) | Unclear           | NA          | 2/3           | Juice <sup>b</sup> |
| Stothers et al (b) Juice-2002  | Yes | Juice (750)  | Unclear           | NA          | 2/3           | Juice <sup>b</sup> |
| Waites et al,2004              | No  | Capsule      | Aim This Way      | 4           | 2             | Lactose            |
| McMurdo et al,2005             | No  | Juice (300)  | Ocean Spray       | 75 (0.838)  | 2             | Juice <sup>c</sup> |
| Hess et al,2008                | Yes | Tablet       | Swiss Herbal      | 1           | 2             | Rice flour         |
| Wing et al (a) High Dose -2008 | Yes | Juice (720)  | Ocean Spray       | 194.4 (318) | 3             | Juice <sup>a</sup> |
| Wing et al (b) Low Dose-2008   | Yes | Juice (240)  | Ocean Spray       | 64.8(106)   | 1             | Juice <sup>a</sup> |
| Ferrara et al,2009             | Yes | Juice (50)   | Unclear           | 7.5         | Not specified | No placebo         |
| Barbosa-Cesnik et al,2011      | Yes | Juice (480)  | Ocean Spray       | 129.6 (224) | 2             | Juice <sup>a</sup> |

|                                      |     |                    |                           |             |     |                    |
|--------------------------------------|-----|--------------------|---------------------------|-------------|-----|--------------------|
| Sengupta et al,2011                  | No  | Capsule            | Decas Botanical Synergies | 0.1 or 1g/d | 2   | No placebo         |
| Stapleton et al,2012                 | Yes | Juice (473 or 946) | Ocean Spray               | NA          | 1   | Juice <sup>a</sup> |
| Salo et al,2012                      | No  | Juice (5 mL/kg)    | Ocean Spray               | 0.21g/kg/d  | 1-2 | Juice <sup>a</sup> |
| Afshar et al,2012                    | No  | Juice (2 mL/kg)    | Ocean Spray               | NA          | 1   | Placebo juice      |
| Takahashi et al,2013                 | No  | Juice (125)        | The Nisshin Oillio Group  | 20-79 (NA)  | 1   | Placebo beverage   |
| Caljouw et al (a) High UTI risk-2014 | No  | Capsule            | Unclear                   | >=65 (84)   | 2   | Placebo capsule    |
| Caljouw et al (b) Low UTI risk-2014  | No  | Capsule            | Unclear                   | >=65 (84)   | 2   | Placebo capsule    |
| Foxman et al,2015                    | Yes | Capsule            | Theralogix, LLC           | Unclear     | 4   | Placebo capsule    |

|                          |     |               |                      |                   |   |                    |
|--------------------------|-----|---------------|----------------------|-------------------|---|--------------------|
| Vostalova et al,2015     | Yes | Capsule       | NA TUREX-DBS         | 0.5g/d<br>(2.8mg) | 2 | Placebo capsule    |
| Ledda et al,2015         | No  | Capsule       | Unclear              | Unclear           | 1 | No placebo         |
| Juthani-Mehta et al,2016 | Yes | Capsule       | Pharmatoka           | 0.072g/d          | 2 | Placebo capsule    |
| Maki et al,2016          | No  | Juice (240)   | Ocean Spray          | NA                | 1 | Juice <sup>a</sup> |
| Wan et al,2016           | No  | Juice (120)   | Ocean Spray          | NA                | 1 | Placebo juice      |
| Ostrovsky et al,2017     | No  | Capsule (590) | Unclear              | Unclear           | 2 | Placebo capsule    |
| Temiz et al,2018         | No  | Capsule       | Unclear              | 0.8(18)           | 2 | No placebo         |
| Mooren et al,2020        | No  | Capsule       | OrthoBasics, Midwoud | NA (72)           | 2 | Placebo capsule    |

<sup>a</sup> Specially designed juice to imitate cranberry juice.

<sup>b</sup> Filtered water with food coloring plus 20-mL pineapple juice. <sup>c</sup> Containing water, sucrose, elderberry extract, quinic acid, citric acid, malic acid, vitamin C, and aspartame.
