# Supplementary material for: Consumption of cranberry as adjuvant therapy for urinary tract infections in susceptible populations: A systematic review and meta-analysis with trial sequential analysis
Source: PubMed Central journal article supplement (PMC8412316; doi:10.1371/journal.pone.0256992), 2021-09-02
Supplement: pone.0256992.s006.pdf [file pone.0256992.s006.pdf]

**S5 Table. Definitions and Outcomes From the 28 Included Randomized Controlled Trials Evaluating Cranberry-Containing Products in the Prevention of UTIs**

| Source            | Outcome Assessment                |                                      |                                        | UTI Cumulative Incidence Rate, No./No. (%) |                    | UTI Incidence Rate (Episodes/Patient-year) |         | Intervention Duration <sup>a</sup> |
|-------------------|-----------------------------------|--------------------------------------|----------------------------------------|--------------------------------------------|--------------------|--------------------------------------------|---------|------------------------------------|
|                   | Threshold of Bacteriuria (CFU/mL) | Pyuria Required in Definition of UTI | Symptoms Required in Definition of UTI | Cranberry                                  | Control            | Cranberry                                  | Control |                                    |
| Avorn et al,1994  | 100 000                           | Yes<br>(undefined)                   | No                                     | 0.15% <sup>b</sup>                         | 28.1% <sup>b</sup> | NA                                         | NA      | 6 mo                               |
| Foda et al,1995   | 100 000                           | No                                   | Yes<br>(undefined)                     | NA                                         | NA                 | 1.8                                        | 1.9     | 6 mo                               |
| Walker et al,1997 | Undefined                         | No                                   | Yes<br>(undefined)                     | NA                                         | NA                 | 2.4                                        | 6.0     | 3 mo                               |

|                                |           |               |               |            |            |     |     |       |
|--------------------------------|-----------|---------------|---------------|------------|------------|-----|-----|-------|
| Schlager et al,1999            | 10 000    | No            | Yes (defined) | 2/15 (13)  | 3/15 (20)  | 0.8 | 0.8 | 3 mo  |
| Kontiokari et al,2001          | 100 000   | No            | Yes (defined) | 8/50 (16)  | 18/50 (36) | NA  | NA  | 6 mo  |
| McGuinness et al,2002          | 1 000 000 | Yes           | No            | 21/62 (34) | 24/73 (33) | NA  | NA  | 6 mo  |
|                                |           | (undefined)   |               |            |            |     |     |       |
| Stothers et al (a) Tablet-2002 | 100 000   | No            | Yes           | 9/50 (18)  | 16/50 (32) | 0.4 | 0.7 | 12 mo |
|                                |           | (undefined)   |               |            |            |     |     |       |
| Stothers et al (b) Juice-2002  | 100 000   | No            | Yes           | 10/50(20)  | 16/50 (32) | 0.3 | 0.7 | 12 mo |
|                                |           | (undefined)   |               |            |            |     |     |       |
| Waites et al,2004              | 10 000    | No            | Yes (defined) | 10/26 (34) | 8/22 (36)  | 1.2 | 1.3 | 6 mo  |
| McMurdo et al,2005             | 10 000    | No            | Yes (defined) | 7/187 (4)  | 14/189 (7) | NA  | NA  | 35 d  |
| Hess et al,2008                | 10 000    | Yes (defined) | Yes (defined) | 6/47 (13)  | 16/47 (34) | 0.3 | 0.9 | 6 mo  |
| Wing et al (a) High Dose-2008  | 100 000   | Yes (defined) | Yes (defined) | 4/58(7)    | 7/63 (11)  | NA  | NA  | 6 mo  |
| Wing et al (b) Low Dose-2008   | 100 000   | Yes (defined) | Yes (defined) | 7/67 (10)  | 7/63 (11)  | NA  | NA  | 6 mo  |

|                                          |           |               |               |             |                 |      |      |       |
|------------------------------------------|-----------|---------------|---------------|-------------|-----------------|------|------|-------|
| Ferrara et al,2009 <sup>1</sup>          | 100 000   | Yes (defined) | Yes (defined) | 5/27 (19)   | 18/27 (67)      | NA   | NA   | 6 mo  |
| Barbosa-Cesnik et al,2011                | 1000      | Yes (defined) | Yes (defined) | 31/155 (20) | 23/164 (14)     | NA   | NA   | 6 mo  |
| Sengupta et al,2011                      | Undefined | No            | No            | 30/44(68)   | 9/13(69)        | NA   | NA   | 90 D  |
| Stapleton et al,2012                     | 100 000   | Yes (defined) | Yes (defined) | 0.29        | 0.37            | NA   | NA   | 6 mo  |
| Salo et al,2012                          | 100 000   | No            | Yes (defined) | 20/126(16)  | 28/129(22)      | 0.25 | 0.41 | 6 mo  |
| Afshar et al,2012                        | 100 000   | No            | Yes (defined) | NA          | NA              | 0.4  | 1.15 | 12 mo |
| Takahashi et al,2013                     | Undefined | No            | No            | 16/55(29)   | 31/63(49)       | NA   | NA   | 24w   |
| Caljouw et al (a) High UTI risk-<br>2014 | Undefined | No            | No            | 98/253 (39) | 125/263<br>(48) | 62.8 | 84.8 | 12mo  |
| Caljouw et al (b) Low UTI risk-<br>2014  | Undefined | No            | No            | 59/205 (29) | 51/207(25)      | NA   | NA   | 12mo  |
| Foxman et al,2015                        | Undefined | No            | No            | 15/80(19)   | 30/80(38)       | NA   | NA   | 6w    |

|                          |           |               |               |            |            |    |    |       |
|--------------------------|-----------|---------------|---------------|------------|------------|----|----|-------|
|                          |           |               |               | 9/83       | 24/93      |    |    |       |
| Vostalova et al,2015     | 100 000   | No            | Yes (defined) | (11)       | (26)       | NA | NA | 6 mo  |
| Ledda et al,2015         | Undefined | No            | No            | NA         | NA         | NA | NA | 60 D  |
| Juthani-Mehta et al,2016 | 100 000   | Yes (defined) | Yes (defined) | 25.5%      | 29.5%      | NA | NA | 12 mo |
| Maki et al,2016          | 100 000   | No            | Yes (defined) | 39/185(21) | 67/188(36) | NA | NA | 24w   |
| Wan et al,2016           | 100 000   | No            | No            | 7/28(25)   | 10/27(37)  | NA | NA | 6 mo  |
| Ostrovsky et al,2017     | 100 000   | No            | No            | 29.1       | 29         | NA | NA | 360 D |
| Temiz et al,2018         | 100 000   | No            | No            | 1/20(5)    | 8/20(40)   | NA | NA | 3 mo  |
| Mooren et al,2020        | Undefined | No            | No            | 13/105(12) | 21/105(20) | NA | NA | 6w    |

CFU=colony-forming unit, NA= Not Available, UTIs=Urinary Tract Infections.

<sup>a</sup> Intervention duration: In crossover trials, intervention duration of each intervention was half of the study duration.

<sup>b</sup> This percentage represented urine samples of bacteriuria with pyuria in all screened urine samples. The odds ratio was 0.42 (95% CI, 0.23-0.76) for bacteriuria with pyuria in cranberry relative to the control group ( $P = .004$ ).
