# Supplementary material for: Consumption of cranberry as adjuvant therapy for urinary tract infections in susceptible populations: A systematic review and meta-analysis with trial sequential analysis
Source: PubMed Central journal article supplement (PMC8412316; doi:10.1371/journal.pone.0256992), 2021-09-02
Supplement: pone.0256992.s007.pdf [file pone.0256992.s007.pdf]

**S6 Table. Summary Results of Sensitivity Analyses From the Included Randomized Controlled Trials Evaluating Cranberry-Containing Products in the Prevention of UTIs**

| Sensitivity Analysis According to: | No. of Trials | Pooled Cumulative Incidence Rate of UTI, No./No. <sup>a</sup> |          | Heterogeneity $I^2$ , % ( $P$ Value) | Risk Ratio (95% CI) | $P$ Value in Meta-regression |
|------------------------------------|---------------|---------------------------------------------------------------|----------|--------------------------------------|---------------------|------------------------------|
|                                    |               | Cranberry                                                     | Control  |                                      |                     |                              |
| <b>Study design</b>                |               |                                                               |          |                                      |                     |                              |
| Parallel                           | 21            | 419/1916                                                      | 555/1939 | 49.2 (0.006)                         | 0.74 (0.67, 0.83)   | 0.265                        |
| Crossover                          | 2             | 39/150                                                        | 51/157   | 0 (0.541)                            | 0.42 (0.20, 0.89)   |                              |
| <b>Study analysis</b>              |               |                                                               |          |                                      |                     |                              |
| ITT                                | 16            | 339/1633                                                      | 456/1680 | 44.2 (0.030)                         | 0.77 (0.68, 0.86)   | 0.478                        |
| PP                                 | 7             | 143/400                                                       | 118/321  | 60.8 (0.018)                         | 0.60(0.47, 0.76)    |                              |
| <b>Treatment in control group</b>  |               |                                                               |          |                                      |                     |                              |
| Placebo                            | 19            | 383/1837                                                      | 521/1869 | 38.9 (0.043)                         | 0.76(0.68, 0.85)    | 0.262                        |

|                                                   |    |          |          |              |                   |       |
|---------------------------------------------------|----|----------|----------|--------------|-------------------|-------|
| No placebo                                        | 4  | 44/141   | 53/110   | 80.1 (0.002) | 0.48 (0.33, 0.68) |       |
| <b>Bacteriuria threshold in definition of UTI</b> |    |          |          |              |                   |       |
| 10 000 CFU/mL                                     | 4  | 25/275   | 41/273   | 18.7 (0.297) | 0.58 (0.37, 0.91) | 0.681 |
| 100 000 CFU/mL                                    | 11 | 119/726  | 219/760  | 0 (0.584)    | 0.55 (0.45, 0.67) |       |
| <b>Pyuria requirement in definition of UTI</b>    |    |          |          |              |                   |       |
| Pyuria unrequired                                 | 17 | 346/1537 | 479/1564 | 37.9 (0.058) | 0.71 (0.63, 0.80) | 0.557 |
| Pyuria required                                   | 6  | 74/416   | 95/437   | 68.2 (0.008) | 0.83(0.63, 1.08)  |       |

---

ITT=Intention To Treat, PP=Per Protocol, UTIs=Urinary Tract Infections.

<sup>a</sup> Pooled incidence rate: number of patients who experienced at least 1 episode of UTI/number of patients at risk during the intervention period.
